# Supplementary material for: Effect of Supplementing Vitamin E, Selenium, Copper, Zinc, and Manganese during the Transition Period on Dairy Cow Reproductive Performance and Immune Function
Source: MDPI journal article supplement (doi:10.3390/vetsci10030225), 2023-03-15
Supplement: s1 [file s1]

**Table S1.** Effects of SeE or CZM supplementation on WBC, RBC, HCT, HGB, MCV, MCH, eosinophils, basophils and monocyte data changes in transition dairy cattle.

| Item <sup>1</sup>            | Treatment <sup>2</sup>      | Days after calving |         |         |         |         |         |
|------------------------------|-----------------------------|--------------------|---------|---------|---------|---------|---------|
|                              |                             | -21                | -14     | -7      | 7       | 14      | 21      |
| <b>WBC</b><br>(1/ul)         | SeE                         | 13276.3            | 13012.5 | 12277.5 | 12262.5 | 13468.8 | 13568.8 |
|                              | CZM                         | 11850.0            | 11988.8 | 11553.8 | 9776.3  | 10725.0 | 11065.0 |
|                              | CON                         | 11002.5            | 11401.3 | 11252.5 | 9737.5  | 9875.0  | 10887.5 |
|                              | SEM                         | 2654.18            | 2677.54 | 1681.69 | 2706.02 | 3478.86 | 3050.03 |
|                              | treatment <i>p</i> value    | 0.23               | 0.50    | 0.48    | 0.10    | 0.09    | 0.15    |
|                              | time <i>p</i> value         | 0.07               |         |         |         |         |         |
|                              | treat × time <i>p</i> value | 0.78               |         |         |         |         |         |
| RBC<br>(10 <sup>6</sup> /ul) | SeE                         | 5.6                | 5.8     | 5.8     | 5.8     | 5.4     | 5.3     |
|                              | CZM                         | 6.1                | 6.1     | 6.1     | 5.9     | 5.5     | 5.4     |
|                              | CON                         | 5.8                | 5.7     | 5.8     | 5.6     | 5.2     | 4.4     |
|                              | SEM                         | 0.62               | 0.74    | 0.61    | 0.62    | 0.57    | 1.10    |
|                              | treatment <i>p</i> value    | 0.29               | 0.51    | 0.51    | 0.56    | 0.63    | 0.12    |
|                              | time <i>p</i> value         | < 0.001            |         |         |         |         |         |
|                              | treat × time <i>p</i> value | 0.10               |         |         |         |         |         |
| HCT<br>(%)                   | SeE                         | 30.1               | 31.2    | 31.8    | 31.0    | 28.3    | 27.2    |
|                              | CZM                         | 31.8               | 32.0    | 32.1    | 30.4    | 27.7    | 27.2    |
|                              | CON                         | 31.1               | 30.7    | 30.9    | 29.4    | 26.8    | 25.1    |
|                              | SEM                         | 2.80               | 3.41    | 3.21    | 2.86    | 2.50    | 2.76    |
|                              | treatment <i>p</i> value    | 0.50               | 0.78    | 0.75    | 0.53    | 0.51    | 0.20    |
|                              | time <i>p</i> value         | < 0.001            |         |         |         |         |         |
|                              | treat × time <i>p</i> value | 0.55               |         |         |         |         |         |
| HGB<br>(g/dl)                | SeE                         | 9.6                | 9.7     | 9.9     | 9.7     | 8.9     | 8.9     |
|                              | CZM                         | 9.8                | 9.8     | 9.9     | 9.4     | 8.6     | 8.5     |
|                              | CON                         | 9.6                | 8.4     | 9.5     | 9.0     | 8.3     | 8.1     |
|                              | SEM                         | 0.77               | 2.14    | 1.00    | 0.93    | 0.82    | 1.00    |
|                              | treatment <i>p</i> value    | 0.83               | 0.36    | 0.72    | 0.30    | 0.36    | 0.29    |
|                              | time <i>p</i> value         | < 0.001            |         |         |         |         |         |
|                              | treat × time <i>p</i> value | 0.72               |         |         |         |         |         |
| MCV<br>(fL)                  | SeE                         | 54.1               | 54.6    | 55.5    | 53.9    | 53.0    | 51.9    |
|                              | CZM                         | 52.3               | 52.4    | 53.0    | 51.4    | 51.0    | 50.7    |
|                              | CON                         | 53.2               | 53.4    | 53.5    | 52.6    | 51.7    | 51.6    |
|                              | SEM                         | 4.36               | 4.40    | 4.06    | 4.33    | 4.12    | 3.65    |
|                              | treatment <i>p</i> value    | 0.72               | 0.65    | 0.46    | 0.55    | 0.64    | 0.81    |
|                              | time <i>p</i> value         | < 0.001            |         |         |         |         |         |
|                              | treat × time <i>p</i> value | 0.86               |         |         |         |         |         |
| MCH<br>(pg)                  | SeE                         | 16.0               | 17.0    | 17.3    | 16.9    | 16.7    | 16.9    |
|                              | CZM                         | 16.1               | 16.1    | 16.4    | 16.0    | 15.8    | 15.8    |
|                              | CON                         | 16.5               | 16.6    | 16.6    | 16.1    | 16.0    | 16.6    |
|                              | SEM                         | 2.07               | 1.56    | 1.39    | 1.59    | 1.44    | 1.81    |
|                              | treatment <i>p</i> value    | 0.91               | 0.55    | 0.37    | 0.44    | 0.44    | 0.49    |
|                              | time <i>p</i> value         | 0.28               |         |         |         |         |         |
|                              | treat × time <i>p</i> value | 0.74               |         |         |         |         |         |
| MCHC<br>(%)                  | SeE                         | 31.9               | 31.1    | 31.2    | 31.3    | 31.5    | 32.5    |
|                              | CZM                         | 30.8               | 30.7    | 30.9    | 31.0    | 30.9    | 31.2    |
|                              | CON                         | 31.0               | 31.1    | 30.9    | 30.6    | 31.0    | 32.2    |
|                              | SEM                         | 1.47               | 0.78    | 0.51    | 0.82    | 0.58    | 2.21    |
|                              | treatment <i>p</i> value    | 0.35               | 0.59    | 0.43    | 0.19    | 0.11    | 0.49    |

|                 |                             |      |      |      |                   |      |      |
|-----------------|-----------------------------|------|------|------|-------------------|------|------|
|                 | time <i>p</i> value         | 0.03 |      |      |                   |      |      |
|                 | treat × time <i>p</i> value | 0.89 |      |      |                   |      |      |
| Eosinophils (%) | SeE                         | 2.2  | 2.4  | 2.2  | 2.5               | 2.4  | 1.9  |
|                 | CZM                         | 2.1  | 1.9  | 2.1  | 2.6               | 2.4  | 2.2  |
|                 | CON                         | 2.3  | 2.7  | 2.5  | 2.9               | 2.3  | 2.2  |
|                 | SEM                         | 0.64 | 0.93 | 0.75 | 0.62              | 0.66 | 0.71 |
|                 | treatment <i>p</i> value    | 0.83 | 0.19 | 0.56 | 0.42              | 0.88 | 0.74 |
|                 | time <i>p</i> value         | 0.06 |      |      |                   |      |      |
|                 | treat × time <i>p</i> value | 0.70 |      |      |                   |      |      |
| Basophils (%)   | SeE                         | 0.7  | 0.7  | 0.7  | 0.6               | 0.7  | 0.6  |
|                 | CZM                         | 0.8  | 0.6  | 0.8  | 0.7               | 0.9  | 0.8  |
|                 | CON                         | 0.7  | 0.6  | 0.6  | 0.8               | 0.7  | 0.5  |
|                 | SEM                         | 0.25 | 0.19 | 0.28 | 0.27              | 0.21 | 0.29 |
|                 | treatment <i>p</i> value    | 0.66 | 0.52 | 0.17 | 0.59              | 0.09 | 0.11 |
|                 | time <i>p</i> value         | 0.48 |      |      |                   |      |      |
|                 | treat × time <i>p</i> value | 0.27 |      |      |                   |      |      |
| Monocyte (%)    | SeE                         | 6.69 | 5.75 | 5.64 | 6.98 <sup>a</sup> | 6.76 | 6.43 |
|                 | CZM                         | 6.84 | 6.41 | 6.25 | 7.07 <sup>a</sup> | 6.53 | 6.55 |
|                 | CON                         | 5.86 | 5.27 | 6.01 | 6.24 <sup>b</sup> | 6.79 | 7.03 |
|                 | SEM                         | 1.63 | 1.78 | 1.31 | 0.66              | 0.98 | 1.82 |
|                 | treatment <i>p</i> value    | 0.45 | 0.46 | 0.66 | 0.01              | 0.85 | 0.80 |
|                 | time <i>p</i> value         | 0.11 |      |      |                   |      |      |
|                 | treat × time <i>p</i> value | 0.83 |      |      |                   |      |      |

<sup>1</sup> WBC, white blood cell count; RBC, red blood cell count; HCT, hematocrit; HGB, hemoglobin; MCV, mean corpuscular volume; MCH, mean corpuscular hemoglobin; MCHC, mean corpuscular hemoglobin concentrate.

<sup>2</sup>SeE: supplemented with 1,500 IU vitamin E and 0.3 ppm of organic Se, n = 8; CZM: supplemented with 12.5 ppm of organic Zn, 5 ppm of organic Cu and 7.5 ppm Mn, n = 8; CON: fed a basal diet without supplementation, n = 8. SEM, standard error of mean.

<sup>ab</sup>, Values within a column with different superscripts differ treatment effect significantly ( $P < 0.05$ ).

Reference value: WBC 4000-12000 (1/ul); RBC 5-10 (10<sup>6</sup>/ul); HCT 24-146 (%); HGB 8-15 (g/dL); MCV 40-60 (fL); MCH 11-17 (pg); MCHC 30-36 (%); eosinophils 0-20 (%); basophils 0-1.6 (%); monocyte 0.75-7 (%) [22].

**Table S2.** Effects of SeE or CZM supplementation on GOT, GPT, GGT, LDH, total protein, albumin, globulin, A/G, BUN, creatinine, triglyceride, CPK, P, Mg, Na, K and Cl data changes in transition dairy cattle.

| Item <sup>1</sup>       | Treatment <sup>2</sup>      | Days after calving  |                     |        |        |        |                      |
|-------------------------|-----------------------------|---------------------|---------------------|--------|--------|--------|----------------------|
|                         |                             | -21                 | -14                 | -7     | 7      | 14     | 21                   |
| <b>GOT</b><br>(U/L)     | SeE                         | 62.9                | 60.4                | 64.6   | 84.6   | 89.2   | 91.6                 |
|                         | CZM                         | 74.0                | 68.9                | 71.8   | 95.1   | 94.7   | 86.9                 |
|                         | CON                         | 65.7                | 63.1                | 71.3   | 93.8   | 92.8   | 91.2                 |
|                         | SEM                         | 11.27               | 8.71                | 9.91   | 17.04  | 20.93  | 20.01                |
|                         | treatment <i>p</i> value    | 0.12                | 0.14                | 0.29   | 0.43   | 0.88   | 0.88                 |
|                         | time <i>p</i> value         | < 0.001             |                     |        |        |        |                      |
|                         | treat × time <i>p</i> value | 0.82                |                     |        |        |        |                      |
| GPT<br>(U/L)            | SeE                         | 24.9                | 23.0                | 20.4   | 19.4   | 22.0   | 26.1                 |
|                         | CZM                         | 23.3                | 20.1                | 21.3   | 18.1   | 22.3   | 21.9                 |
|                         | CON                         | 25.0                | 25.1                | 22.8   | 22.6   | 23.1   | 24.4                 |
|                         | SEM                         | 5.61                | 5.96                | 3.62   | 5.71   | 4.65   | 5.14                 |
|                         | treatment <i>p</i> value    | 0.80                | 0.24                | 0.46   | 0.27   | 0.90   | 0.27                 |
|                         | time <i>p</i> value         | < 0.01              |                     |        |        |        |                      |
|                         | treat × time <i>p</i> value | 0.66                |                     |        |        |        |                      |
| GGT<br>(U/L)            | SeE                         | 15.6                | 13.4                | 14.4   | 15.4   | 14.6   | 21.0                 |
|                         | CZM                         | 14.8                | 15.0                | 14.0   | 16.1   | 15.2   | 19.3                 |
|                         | CON                         | 14.1                | 14.3                | 15.2   | 14.9   | 17.7   | 18.3                 |
|                         | SEM                         | 3.07                | 3.58                | 3.12   | 3.58   | 6.55   | 6.17                 |
|                         | treatment <i>p</i> value    | 0.63                | 0.71                | 0.77   | 0.80   | 0.62   | 0.69                 |
|                         | time <i>p</i> value         | < 0.001             |                     |        |        |        |                      |
|                         | treat × time <i>p</i> value | 0.77                |                     |        |        |        |                      |
| LDH<br>(U/L)            | SeE                         | 1849.3 <sup>b</sup> | 1743.3 <sup>b</sup> | 1722.6 | 1891.8 | 1942.8 | 2249.1 <sup>a</sup>  |
|                         | CZM                         | 2154.3 <sup>a</sup> | 2055.8 <sup>a</sup> | 1988.0 | 1971.0 | 2020.5 | 2092.2 <sup>ab</sup> |
|                         | CON                         | 1799.3 <sup>b</sup> | 1742.3 <sup>b</sup> | 1852.7 | 1776.7 | 1924.6 | 1827.0 <sup>b</sup>  |
|                         | SEM                         | 265.04              | 247.07              | 251.92 | 269.86 | 255.72 | 300.99               |
|                         | treatment <i>p</i> value    | 0.01                | 0.01                | 0.11   | 0.37   | 0.75   | 0.01                 |
|                         | time <i>p</i> value         | < 0.01              |                     |        |        |        |                      |
|                         | treat × time <i>p</i> value | 0.01                |                     |        |        |        |                      |
| Total Protein<br>(g/dL) | SeE                         | 7.03                | 6.61                | 6.66   | 6.62   | 7.14   | 7.49                 |
|                         | CZM                         | 6.94                | 6.42                | 6.49   | 6.66   | 7.24   | 7.51                 |
|                         | CON                         | 6.88                | 6.69                | 6.47   | 7.15   | 6.87   | 7.31                 |
|                         | SEM                         | 0.68                | 0.73                | 0.58   | 0.53   | 0.68   | 0.55                 |
|                         | treatment <i>p</i> value    | 0.92                | 0.78                | 0.79   | 0.07   | 0.54   | 0.75                 |
|                         | time <i>p</i> value         | < 0.001             |                     |        |        |        |                      |
|                         | treat × time <i>p</i> value | 0.32                |                     |        |        |        |                      |
| Albumin<br>(g/dL)       | SeE                         | 3.95                | 3.65                | 3.74   | 3.41   | 3.61   | 3.85                 |
|                         | CZM                         | 3.75                | 3.68                | 3.49   | 3.64   | 3.68   | 3.69                 |
|                         | CON                         | 3.54                | 3.59                | 3.59   | 3.77   | 3.42   | 3.57                 |
|                         | SEM                         | 0.45                | 0.47                | 0.35   | 0.48   | 0.55   | 0.35                 |
|                         | treatment <i>p</i> value    | 0.20                | 0.93                | 0.38   | 0.33   | 0.65   | 0.28                 |
|                         | time <i>p</i> value         | 0.52                |                     |        |        |        |                      |
|                         | treat × time <i>p</i> value | 0.22                |                     |        |        |        |                      |
| Globulin<br>(g/dL)      | SeE                         | 3.08                | 2.96                | 2.92   | 3.09   | 3.54   | 3.64                 |
|                         | CZM                         | 3.06                | 2.74                | 2.99   | 3.13   | 3.56   | 3.80                 |
|                         | CON                         | 3.34                | 3.10                | 2.89   | 3.38   | 3.45   | 3.74                 |
|                         | SEM                         | 0.55                | 0.47                | 0.42   | 0.54   | 0.58   | 0.60                 |
|                         | treatment <i>p</i> value    | 0.54                | 0.33                | 0.89   | 0.53   | 0.93   | 0.87                 |
|                         | time <i>p</i> value         | 0.52                |                     |        |        |        |                      |

|                              |                          |                             |         |       |       |                    |        |
|------------------------------|--------------------------|-----------------------------|---------|-------|-------|--------------------|--------|
|                              |                          | time <i>p</i> value         | < 0.001 |       |       |                    |        |
|                              |                          | treat × time <i>p</i> value | 0.84    |       |       |                    |        |
| A/G                          | SeE                      | 1.3                         | 1.2     | 1.3   | 1.2   | 1.1                | 1.1    |
|                              | CZM                      | 1.2                         | 1.3     | 1.2   | 1.1   | 1.0                | 1.0    |
|                              | CON                      | 1.1                         | 1.1     | 1.1   | 1.1   | 1.0                | 1.0    |
|                              | SEM                      | 0.23                        | 0.23    | 0.21  | 0.26  | 0.26               | 0.26   |
|                              | treatment <i>p</i> value | 0.19                        | 0.15    | 0.37  | 0.97  | 0.97               | 0.42   |
|                              | time <i>p</i> value      | < 0.01                      |         |       |       |                    |        |
|                              |                          | treat × time <i>p</i> value | 0.72    |       |       |                    |        |
| BUN<br>(mg/dL)               | SeE                      | 6.0                         | 7.6     | 7.9   | 13.9  | 15.1 <sup>a</sup>  | 12.5   |
|                              | CZM                      | 6.9                         | 6.2     | 8.0   | 11.2  | 12.3 <sup>ab</sup> | 14.2   |
|                              | CON                      | 6.9                         | 5.4     | 7.4   | 11.1  | 10.7 <sup>b</sup>  | 12.0   |
|                              | SEM                      | 2.07                        | 2.70    | 2.13  | 3.44  | 3.34               | 3.03   |
|                              | treatment <i>p</i> value | 0.63                        | 0.26    | 0.86  | 0.17  | 0.02               | 0.35   |
|                              | time <i>p</i> value      | < 0.001                     |         |       |       |                    |        |
|                              |                          | treat × time <i>p</i> value | 0.13    |       |       |                    |        |
| Creatinine<br>(mg/dL)        | SeE                      | 1.47                        | 1.49    | 1.47  | 1.29  | 1.08               | 1.09   |
|                              | CZM                      | 1.52                        | 1.50    | 1.51  | 1.12  | 1.06               | 1.01   |
|                              | CON                      | 1.42                        | 1.42    | 1.46  | 1.25  | 1.25               | 1.18   |
|                              | SEM                      | 0.11                        | 0.13    | 0.14  | 0.19  | 0.21               | 0.19   |
|                              | treatment <i>p</i> value | 0.15                        | 0.44    | 0.71  | 0.21  | 0.14               | 0.23   |
|                              | time <i>p</i> value      | < 0.001                     |         |       |       |                    |        |
|                              |                          | treat × time <i>p</i> value | 0.02    |       |       |                    |        |
| Triglyceride<br>(mg/dL)<br>- | SeE                      | 28.3                        | 23.1    | 21.4  | 12.9  | 15.4               | 13.1   |
|                              | CZM                      | 25.4                        | 19.7    | 18.4  | 13.7  | 12.2               | 10.9   |
|                              | CON                      | 22.9                        | 25.6    | 22.2  | 16.4  | 10.2               | 17.8   |
|                              | SEM                      | 7.12                        | 7.12    | 5.41  | 7.18  | 8.26               | 7.49   |
|                              | treatment <i>p</i> value | 0.34                        | 0.25    | 0.34  | 0.61  | 0.46               | 0.17   |
|                              | time <i>p</i> value      | < 0.001                     |         |       |       |                    |        |
|                              |                          | treat × time <i>p</i> value | 0.12    |       |       |                    |        |
| CPK<br>(U/L)                 | SeE                      | 240.4                       | 174.2   | 197.2 | 197.0 | 315.1              | 270.2  |
|                              | CZM                      | 219.0                       | 227.5   | 241.3 | 267.8 | 259.1              | 248.9  |
|                              | CON                      | 166.2                       | 170.8   | 183.2 | 211.9 | 173.8              | 216.7  |
|                              | SEM                      | 88.30                       | 90.19   | 79.59 | 93.45 | 130.59             | 103.83 |
|                              | treatment <i>p</i> value | 0.23                        | 0.39    | 0.33  | 0.29  | 0.09               | 0.60   |
|                              | time <i>p</i> value      | 0.16                        |         |       |       |                    |        |
|                              |                          | treat × time <i>p</i> value | 0.41    |       |       |                    |        |
| P<br>(mg/dL)                 | SeE                      | 6.20                        | 6.54    | 6.64  | 5.54  | 6.46               | 6.06   |
|                              | CZM                      | 6.64                        | 6.68    | 6.68  | 4.88  | 5.70               | 6.00   |
|                              | CON                      | 6.30                        | 5.88    | 6.34  | 4.85  | 5.29               | 5.35   |
|                              | SEM                      | 1.10                        | 1.43    | 1.01  | 1.18  | 1.29               | 1.14   |
|                              | treatment <i>p</i> value | 0.72                        | 0.51    | 0.78  | 0.44  | 0.19               | 0.40   |
|                              | time <i>p</i> value      | < 0.001                     |         |       |       |                    |        |
|                              |                          | treat × time <i>P</i> value | 0.49    |       |       |                    |        |
| Mg<br>(mg/dL)                | SeE                      | 2.29                        | 3.10    | 3.28  | 4.60  | 4.43               | 4.84   |
|                              | CZM                      | 2.39                        | 2.43    | 2.82  | 2.37  | 5.41               | 4.75   |
|                              | CON                      | 3.33                        | 2.35    | 2.55  | 3.73  | 3.80               | 3.83   |
|                              | SEM                      | 1.40                        | 1.38    | 1.20  | 2.60  | 2.94               | 2.90   |
|                              | treatment <i>p</i> value | 0.27                        | 0.51    | 0.50  | 0.23  | 0.56               | 0.76   |
|                              | Time <i>p</i> value      | < 0.001                     |         |       |       |                    |        |
|                              |                          | treat × time <i>p</i> value | 0.20    |       |       |                    |        |
| Na                           | SeE                      | 146.6                       | 147.6   | 147.4 | 144.9 | 143.3              | 142.9  |

|          |                             |         |       |       |       |       |       |
|----------|-----------------------------|---------|-------|-------|-------|-------|-------|
| (mmol/L) | CZM                         | 146.3   | 147.7 | 148.1 | 145.5 | 143.6 | 143.8 |
|          | CON                         | 147.2   | 146.9 | 147.4 | 146.3 | 145.9 | 145.8 |
|          | SEM                         | 1.37    | 3.16  | 2.37  | 2.38  | 3.38  | 2.58  |
|          | treatment <i>p</i> value    | 0.36    | 0.85  | 0.79  | 0.53  | 0.25  | 0.07  |
|          | time <i>p</i> value         | < 0.001 |       |       |       |       |       |
|          | treat × time <i>p</i> value | 0.49    |       |       |       |       |       |
| (mmol/L) | SeE                         | 4.65    | 4.44  | 4.40  | 4.53  | 4.44  | 4.56  |
|          | CZM                         | 4.71    | 4.53  | 4.56  | 4.46  | 4.69  | 4.38  |
|          | CON                         | 4.58    | 4.41  | 4.49  | 4.53  | 4.50  | 4.40  |
|          | SEM                         | 0.39    | 0.27  | 0.21  | 0.21  | 0.32  | 0.30  |
|          | treatment <i>p</i> value    | 0.80    | 0.70  | 0.36  | 0.81  | 0.28  | 0.41  |
|          | time <i>p</i> value         | 0.21    |       |       |       |       |       |
|          | treat × time <i>p</i> value | 0.79    |       |       |       |       |       |
| (mmol/L) | SeE                         | 107.0   | 106.6 | 107.7 | 104.3 | 103.0 | 102.6 |
|          | CZM                         | 106.6   | 107.5 | 108.9 | 106.5 | 102.9 | 102.5 |
|          | CON                         | 107.5   | 106.9 | 107.9 | 104.9 | 105.0 | 103.5 |
|          | SEM                         | 2.263   | 3.393 | 2.641 | 2.498 | 3.609 | 2.643 |
|          | treatment <i>p</i> value    | 0.78    | 0.89  | 0.65  | 0.20  | 0.44  | 0.73  |
|          | time <i>p</i> value         | < 0.001 |       |       |       |       |       |
|          | treat × time <i>p</i> value | 0.85    |       |       |       |       |       |

**Table S3.** Effects of SeE or CZM supplementation on MLP, MUN, MSNFP, MTSP, MC and SCC data changes in transition dairy cattle.

| Item <sup>1</sup>            | Treatment <sup>2</sup>      | Days after calving |                     |                    |                    |                    |
|------------------------------|-----------------------------|--------------------|---------------------|--------------------|--------------------|--------------------|
|                              |                             | 7                  | 14                  | 21                 | 30                 | 60                 |
| MLP (%)                      | SeE                         | 4.38 <sup>b</sup>  | 4.69 <sup>b</sup>   | 4.71 <sup>b</sup>  | 4.87 <sup>b</sup>  | 4.80 <sup>b</sup>  |
|                              | CZM                         | 4.65 <sup>a</sup>  | 4.95 <sup>a</sup>   | 4.97 <sup>a</sup>  | 5.03 <sup>a</sup>  | 5.03 <sup>a</sup>  |
|                              | CON                         | 4.40 <sup>b</sup>  | 4.76 <sup>b</sup>   | 4.83 <sup>ab</sup> | 4.95 <sup>ab</sup> | 4.82 <sup>b</sup>  |
|                              | SEM                         | 0.29               | 0.17                | 0.22               | 0.14               | 0.18               |
|                              | treatment <i>p</i> value    | 0.01               | < 0.001             | < 0.01             | < 0.01             | < 0.001            |
|                              | time <i>p</i> value         | < 0.001            |                     |                    |                    |                    |
|                              | treat × time <i>p</i> value | 0.40               |                     |                    |                    |                    |
| MUN (mg/dL)                  | SeE                         | 14.5               | 14.3 <sup>a</sup>   | 13.6               | 15.0 <sup>a</sup>  | 14.2 <sup>ab</sup> |
|                              | CZM                         | 11.3               | 11.5 <sup>b</sup>   | 12.6               | 13.3 <sup>b</sup>  | 15.5 <sup>a</sup>  |
|                              | CON                         | 14.3               | 11.9 <sup>b</sup>   | 12.3               | 13.5 <sup>ab</sup> | 13.4 <sup>b</sup>  |
|                              | SEM                         | 3.92               | 2.35                | 1.95               | 1.97               | 2.18               |
|                              | treatment <i>p</i> value    | 0.03               | < 0.01              | 0.17               | 0.03               | 0.02               |
|                              | time <i>p</i> value         | < 0.001            |                     |                    |                    |                    |
|                              | treat × time <i>p</i> value | < 0.001            |                     |                    |                    |                    |
| MSNFP (%)                    | SeE                         | 9.50               | 8.68 <sup>ab</sup>  | 8.37               | 8.38 <sup>b</sup>  | 8.37               |
|                              | CZM                         | 9.18               | 8.82 <sup>a</sup>   | 8.62               | 8.63 <sup>a</sup>  | 8.72               |
|                              | CON                         | 8.72               | 8.60 <sup>b</sup>   | 8.42               | 8.49 <sup>ab</sup> | 8.37               |
|                              | SEM                         | 1.18               | 0.27                | 0.39               | 0.27               | 1.13               |
|                              | treatment <i>p</i> value    | 0.17               | 0.05                | 0.15               | 0.03               | 0.62               |
|                              | time <i>p</i> value         | < 0.001            |                     |                    |                    |                    |
|                              | treat × time <i>p</i> value | 0.38               |                     |                    |                    |                    |
| MTSP (%)                     | SeE                         | 12.86              | 12.60               | 12.16              | 12.00              | 11.21              |
|                              | CZM                         | 13.32              | 12.53               | 12.53              | 12.38              | 12.58              |
|                              | CON                         | 13.52              | 12.80               | 12.43              | 12.12              | 11.95              |
|                              | SEM                         | 1.39               | 0.65                | 0.63               | 0.72               | 2.45               |
|                              | treatment <i>p</i> value    | 0.39               | 0.46                | 0.13               | 0.30               | 0.29               |
|                              | time <i>p</i> value         | < 0.01             |                     |                    |                    |                    |
|                              | treat × time <i>p</i> value | 0.89               |                     |                    |                    |                    |
| MC (mg/dL)                   | SeE                         | 181.3              | 195.6 <sup>a</sup>  | 186.5              | 173.6              | 166.3              |
|                              | CZM                         | 188.8              | 176 <sup>ab</sup>   | 171.4              | 162.5              | 167.1              |
|                              | CON                         | 183.3              | 168.5 <sup>b</sup>  | 167.8              | 170.4              | 153.9              |
|                              | SEM                         | 31.02              | 31.59               | 25.60              | 23.43              | 19.34              |
|                              | treatment <i>p</i> value    | 0.79               | 0.04                | 0.09               | 0.39               | 0.09               |
|                              | time <i>p</i> value         | < 0.001            |                     |                    |                    |                    |
|                              | treat × time <i>p</i> value | 0.02               |                     |                    |                    |                    |
| SCC<br>(10 <sup>3</sup> /ml) | SeE                         | 875.0              | 229.3 <sup>b</sup>  | 247.0              | 132.9              | 436.5              |
|                              | CZM                         | 426.9              | 90.1 <sup>b</sup>   | 181.0              | 80.9               | 91.3               |
|                              | CON                         | 2612.0             | 1004.0 <sup>a</sup> | 1001.0             | 481.6              | 601.7              |
|                              | SEM                         | 3337.6             | 758.5               | 1203.9             | 569.3              | 715.2              |
|                              | treatment <i>p</i> value    | 0.15               | < 0.001             | 0.10               | 0.09               | 0.12               |
|                              | time <i>p</i> value         | < 0.001            |                     |                    |                    |                    |
|                              | treat × time <i>p</i> value | 0.14               |                     |                    |                    |                    |

<sup>1</sup>MLP, milk lactose percentage; MUN, milk urea nitrogen, MSNFP, milk solids-not-fat percentage; MTSP, milk total solid percentage; MC, milk citrate; SCC, somatic cell counts.

<sup>2</sup>SeE: supplemented with 1,500 IU vitamin E and 0.3 ppm of organic Se, n = 8; CZM: supplemented with 12.5 ppm of organic Zn, 5 ppm of organic Cu and 7.5 ppm Mn, n = 8; CON: fed a basal diet without supplementation, n = 8. SEM, standard error of mean.

---

<sup>ab</sup>, Values within a column with different superscripts differ treatment effect significantly ( $p < 0.05$ ).
